# Supplementary material for: Phylogeographic Aspects of Bat Lyssaviruses in Europe: A Review
Source: MDPI journal article supplement (doi:10.3390/pathogens12091089), 2023-08-27
Supplement: s1 [file s1]

**Table S1.** Complete N+P+M+G+L coding regions reference sequences from GenBank used in the analysis. Virus names are: Rabies virus (RABV), Aravan virus (ARAV), Australian bat lyssavirus (ABLV), Bokeloh bat lyssavirus (BBLV), Duvenhage virus (DUVV), European bat lyssavirus 1 (EBLV-1), European bat lyssavirus 2 (EBLV-2), Gannoruwa bat lyssavirus (GBLV), Irkut virus (IRKV), Khujand virus (KHUV), Lagos bat virus (LBV), Mokola virus (MOKV), Shimoni bat virus (SHIBV), Kotalahti bat lyssavirus (KBVL), Divača bat lyssavirus (DBLV), and Lyssavirus Formosa, which includes Taiwan bat lyssavirus 1 (TWBLV-1) and Taiwan bat lyssavirus 2 (TWBLV-2).

| Virus species | Geographical origin | Year | Host                              | GenBank reference | Reference              |
|---------------|---------------------|------|-----------------------------------|-------------------|------------------------|
| RABV          | USA                 | 1986 | Baby Hamster Kidney (BHK-21)      | NC_001542         | Tordo et al. [88]      |
| ARAV          | Kyrgyzstan          | 2003 | <i>Myotis blythi</i>              | NC_020808         | Kuzmin et al. [80]     |
| ABLV          | Australia           | 1998 | <i>Saccolaimus flaviventris</i>   | NC_003243         | Gould et al. [89]      |
| BBLV          | Germany             | 2010 | <i>Myotis nattererii</i>          | NC_025251         | Freuling et al. [50]   |
| DUVV          | South Africa        | 1971 | <i>Homo sapiens</i>               | NC_020810         | Delmas et al. [82]     |
| EBLV-1        | Germany             | 1968 | <i>Eptesicus serotinus</i>        | NC_009527         | Marston et al. [90]    |
| EBLV-2        | United Kingdom      | 2002 | <i>Homo sapiens</i>               | NC_009528         | Marston et al. [90]    |
| GBLV          | Sri Lanka           | 2015 | <i>Pteropus giganteus</i>         | NC_031988         | Gunawardena [86]       |
| IRKV          | Russia              | 2003 | <i>Murina leucogaster</i>         | NC_020809         | Kuzmin et al. [72]     |
| KHUV          | Tajikistan          | 2003 | <i>Murina leucogaster</i>         | NC_025385         | Kuzmin et al. [79]     |
| LBV           | Senegal             | 1985 | <i>Eidolon helvum</i>             | NC_020807         | Delmas et al. [82]     |
| MOKV          | sub-Saharan Africa  | 1996 | <i>Felis catus</i>                | NC_006429         | Le Mercier et al. [91] |
| SHIBV         | Kenya               | 2009 | <i>Hipposideros commersoni</i>    | NC_025365         | Kuzmin et al. [87]     |
| KBVL          | Finland             | 2017 | <i>Myotis brandti</i>             | LR994545          | Calvelage et al. [32]  |
| DBLV          | Slovenia            | 2023 | <i>Myotis capaccinii</i>          | OQ428158          | Černe et al. [35]      |
| TWBLV-1       | Taiwan              | 2018 | <i>Pipistrellus abramus</i>       | ON437590          | Hu et al. [33]         |
| TWBLV-2       | Taiwan              | 2018 | <i>Nyctalus plancyi velutinus</i> | ON437589          | Hu et al. [33]         |
